# Supplementary material
Source: publisher site journal article supplement (https://www.dovepress.com/article/supplementary_file/617883/617883%20Supplementary.docx)
Supplement: Supplementary file 1 [file 617883%20Supplementary.docx]

**Supplementary Table S1.** Hyperparameter tuning strategy for each machine learning model.

| Model | Random seed | Hyperparameters tuned |
| --- | --- | --- |
| Logistic Regression (LR) | 12 | alpha = 0.1, 0.5, 1; lambda = 0.1, 0.5, 0.7 |
| Random Forest (RF) | 12 | mtry = 2, 4; ntree = 300, 400; nodesize = 40, 45; maxnodes = 30; sampsize = 200 |
| eXtreme Gradient Boosting (XGBoost) | 12 | max_depth = 1; eta = 0.02; subsample = 0.40, 0.45; colsample_bytree = 0.40, 0.45; reg_alpha = 0.5; reg_lambda = 3.0, 3.5; gamma = 0.4; scale_pos_weight = negative/positive class ratio; nrounds = 200 |
| Light Gradient Boosting Machine (LGBM) | 12 | num_leaves = 6, 8; reg_lambda = 1.0, 2.0; subsample = 0.5, 0.7; colsample_bytree = 0.8; learning_rate = 0.05; min_data_in_leaf = 45; min_sum_hessian_in_leaf = 40; reg_alpha = 0.4; nrounds determined by early stopping |
| Neural Network (NNet) | 12 | size = 2, 4, 6; decay = 0.01, 0.1, 1, 3, 5 |
| Naive Bayes (NB) | 12 | fL = 0, 0.5, 1.0; usekernel = TRUE; adjust = 0.5, 1.0, 1.5, 2.0 |
| K-Nearest Neighbors (KNN) | 12 | k = 5, 7, 9, 11, 13, 15, 17 |
| Decision Tree (DT) | 12 | cp = 0.01, 0.05, 0.1; maxdepth = 8, 10, 15; minsplit = 10, 20, 40; minbucket = 5, 10, 20 |

**Supplementary Table S2.** Baseline characteristics of participants in the training and testing sets.

| Variable | Total  (N = 969) | Training set  (N = 679) | Testing set  (N = 290) | Statistics | *p*-value |
| --- | --- | --- | --- | --- | --- |
| Age (years) | 34.0 [30.0, 39.0] | 34.0 [30.0, 39.0] | 34.0 [30.0, 38.3] | -0.999 | 0.318 |
| Gender |  |  |  |  |  |
| Male | 120 (12.4%) | 82 (12.1%) | 38 (13.1%) | 0.197 | 0.657 |
| Female | 849 (87.6%) | 597 (87.9%) | 252 (86.9%) |  |  |
| Hospital level |  |  |  |  |  |
| Tertiary hospital | 762 (78.6%) | 543 (80.0%) | 219 (75.5%) | 2.399 | 0.121 |
| Secondary hospital or below | 207 (21.4%) | 136 (20.0%) | 71 (24.5%) |  |  |
| Marital status |  |  |  |  |  |
| Married/Living with partner | 590 (60.9%) | 421 (62.0%) | 169 (58.3%) | 1.185 | 0.276 |
| Single/Divorced/widow | 379 (39.1%) | 258 (38.0%) | 121 (41.7%) |  |  |
| Education level |  |  |  |  |  |
| College degree or below | 663 (68.4%) | 462 (68.0%) | 201 (69.3%) | 0.151 | 0.697 |
| Bachelor degree or above | 306 (31.6%) | 217 (32.0%) | 89 (30.7%) |  |  |
| Smoking habit |  |  |  |  |  |
| No | 922 (95.1%) | 650 (95.7%) | 272 (93.8%) | 1.650 | 0.199 |
| Yes | 47 (4.9%) | 29 (4.3%) | 18 (6.2%) |  |  |
| Alcohol consumption |  |  |  |  |  |
| No | 893 (92.2%) | 624 (91.9%) | 269 (92.8%) | 0.207 | 0.649 |
| Yes | 76 (7.8%) | 55 (8.1%) | 21 (7.2%) |  |  |
| Years of work |  |  |  |  |  |
| ≤5 | 241 (24.9%) | 169 (24.9%) | 72 (24.8%) | 0.335 | 0.846 |
| 6-10 | 419 (43.2%) | 290 (42.7%) | 129 (44.5%) |  |  |
| >10 | 309 (31.9%) | 220 (32.4%) | 89 (30.7%) |  |  |
| Professional title |  |  |  |  |  |
| Nurse | 488 (50.4%) | 343 (50.5%) | 145 (50.0%) | 0.654 | 0.721 |
| Senior nurse | 412 (42.5%) | 285 (42.0%) | 127 (43.8%) |  |  |
| Head Nurse or above | 69 (7.1%) | 51 (7.5%) | 18 (6.2%) |  |  |
| Number of children |  |  |  |  |  |
| 0-1 | 853 (88.0%) | 598 (88.1%) | 255 (87.9%) | 0.004 | 0.951 |
| ≥2 | 116 (12.0%) | 81 (11.9%) | 35 (12.1%) |  |  |
| Monthly income (yuan) |  |  |  |  |  |
| <4,000 | 277 (28.6%) | 193 (28.4%) | 84 (29.0%) | 0.071 | 0.965 |
| 4, 000-6,000 | 434 (44.8%) | 306 (45.1%) | 128 (44.1%) |  |  |
| ≥6,000 | 258 (26.6%) | 180 (26.5%) | 78 (26.9%) |  |  |
| Night shift per month (frequency) | |  |  |  |  |
| ≤1 | 272 (28.1%) | 195 (28.7%) | 77 (26.6%) | 0.630 | 0.730 |
| 2-5 | 398 (41.1%) | 274 (40.4%) | 124 (42.8%) |  |  |
| ≥6 | 299 (30.9%) | 210 (30.9%) | 89 (30.7%) |  |  |
| Self-health status |  |  |  |  |  |
| Good | 576 (59.4%) | 405 (59.6%) | 171 (59.0%) | 0.428 | 0.807 |
| Fair | 330 (34.1%) | 228 (33.6%) | 102 (35.2%) |  |  |
| Poor/Illness | 63 (6.5%) | 46 (6.8%) | 17 (5.9%) |  |  |
| Diet habit |  |  |  |  |  |
| Regular | 384 (39.6%) | 275 (40.5%) | 109 (37.6%) | 0.722 | 0.396 |
| Irregular | 585 (60.4%) | 404 (59.5%) | 181 (62.4%) |  |  |
| Exercise habit |  |  |  |  |  |
| No | 644 (66.5%) | 445 (65.5%) | 199 (68.6%) | 0.867 | 0.352 |
| Yes | 325 (33.5%) | 234 (34.5%) | 91 (31.4%) |  |  |
| Daily working hours |  |  |  |  |  |
| ≤8 h | 283 (29.2%) | 199 (29.3%) | 84 (29.0%) | 0.012 | 0.915 |
| >8 h | 686 (70.8%) | 480 (70.7%) | 206 (71.0%) |  |  |
| Department |  |  |  |  |  |
| Emergency/critical/oncology | 380 (39.2%) | 267 (39.3%) | 113 (39.0%) | 0.011 | 0.917 |
| Others | 589 (60.8%) | 412 (60.7%) | 177 (61.0%) |  |  |
| Attending mental health training | |  |  |  |  |
| No | 594 (61.3%) | 422 (62.2%) | 172 (59.3%) | 0.691 | 0.406 |
| Yes | 375 (38.7%) | 257 (37.8%) | 118 (40.7%) |  |  |
| Sleep time per day |  |  |  |  |  |
| ≥7 h | 266 (27.5%) | 188 (27.7%) | 78 (26.9%) | 0.064 | 0.800 |
| <7 h | 703 (72.5%) | 491 (72.3%) | 212 (73.1%) |  |  |
| Workplace violence |  |  |  |  |  |
| Never | 348 (35.9%) | 247 (36.4%) | 101 (34.8%) | 2.276 | 0.517 |
| Low | 427 (44.1%) | 290 (42.7%) | 137 (47.2%) |  |  |
| Intermediate | 165 (17.0%) | 122 (18.0%) | 43 (14.8%) |  |  |
| High | 29 (3.0%) | 20 (2.9%) | 9 (3.1%) |  |  |
| Social support | 47.0 [41.0, 59.0] | 47.0 [41.0, 59.0] | 47.5 [41.0, 60.0] | -0.164 | 0.870 |
| Mindfulness | 40.0 [28.0, 49.0] | 40.0 [28.0, 50.0] | 40.0 [29.0, 48.0] | -0.318 | 0.750 |
| Psychological resilience | 30.0 [23.0, 39.0] | 31.0 [24.0, 39.0] | 28.0 [22.0, 38.0] | -1.588 | 0.112 |
| Self-efficacy | 22.0 [17.0, 28.0] | 23.0 [17.0, 28.0] | 22.0 [16.0, 28.0] | -0.401 | 0.689 |
| Occupational stress | 46.0 [39.0, 59.0] | 45.0 [38.0, 58.0] | 46.0 [40.0, 60.3] | -1.596 | 0.110 |
| Work engagement | 29.0 [17.0, 41.0] | 29.0 [17.0, 41.0] | 31.0 [17.0, 41.0] | -0.228 | 0.820 |
| CF |  |  |  |  |  |
| No | 424 (43.8%) | 291 (42.9%) | 133 (45.9%) | 0.746 | 0.388 |
| Yes | 545 (56.2%) | 388 (57.1%) | 157 (54.1%) |  |  |

Notes. CF, Compassion Fatigue.

**
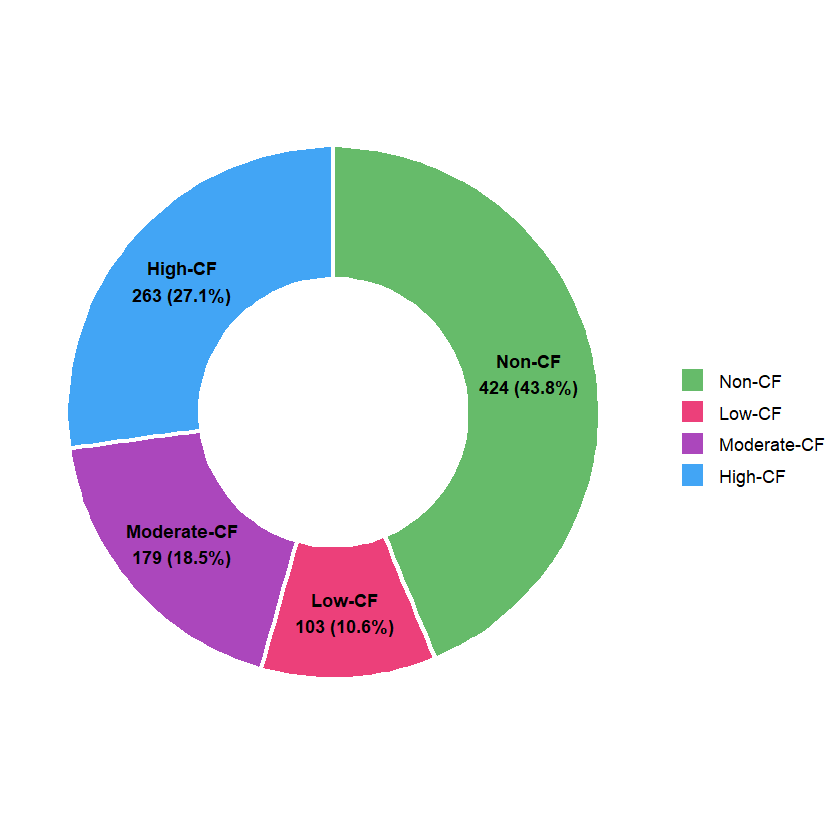
**

**Supplementary Figure S1**. Distribution of CF severity among the included clinical nurses (n = 969), classified according to the predefined ProQOL criteria. **Abbreviations:** CF, Compassion Fatigue; ProQOL, Professional Quality of Life Scale.
